# Supplementary material for: Intracellular aggregation of peptide-reprogrammed small molecule nanoassemblies enhances cancer chemotherapy and combinatorial immunotherapy
Source: PubMed Central journal article supplement — Acta Pharm Sin B. 2020 Jun 29;11(4):1069–82. doi: 10.1016/j.apsb.2020.06.013 (PMC8105769; doi:10.1016/j.apsb.2020.06.013), 2020-06-29
Supplement: mmc1.pdf [file mmc1.pdf]

**Supporting Information for**

**ORIGINAL ARTICLE**

**Intracellular aggregation of peptide-reprogrammed small molecule nanoassemblies enhances cancer chemotherapy and combinatorial immunotherapy**

Jinrong Peng, Yao Xiao, Qian Yang, Qingya Liu, Yu Chen, Kun Shi, Ying Hao, Ruxia Han, Zhiyong Qian\*

*State Key Laboratory of Biotherapy and Cancer Center, West China Hospital, Sichuan University, and Collaborative Innovation Center of Biotherapy, Chengdu 610065, China*

\*Corresponding author.

E-mail address: [anderson-qian@163.com](mailto:anderson-qian@163.com), [zhiyongqian@scu.edu.cn](mailto:zhiyongqian@scu.edu.cn) (Zhiyong Qian).

Received 5 March 2020; Received in revised form 15 April 2020; accepted 5 June 2020

Figure S1

A) CDDP-(OH)<sub>2</sub> (<sup>1</sup>H-NMR)

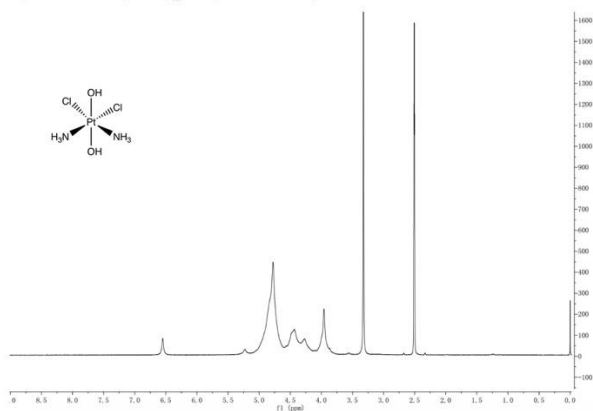

B) HCDDP (<sup>1</sup>H-NMR)

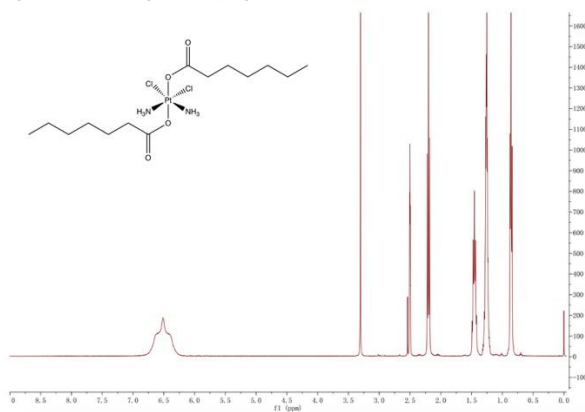

C) FCDDP (<sup>19</sup>F-NMR)

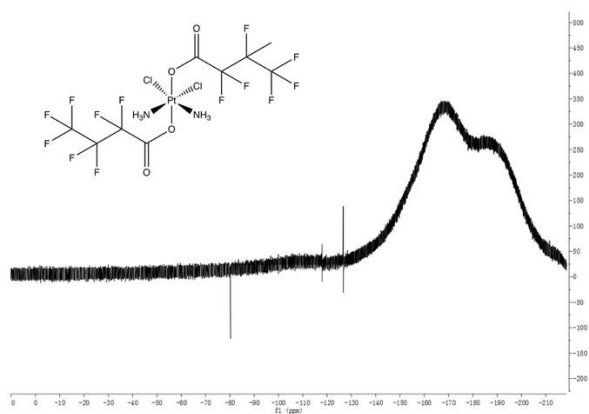

D) HCDDP (XPS)

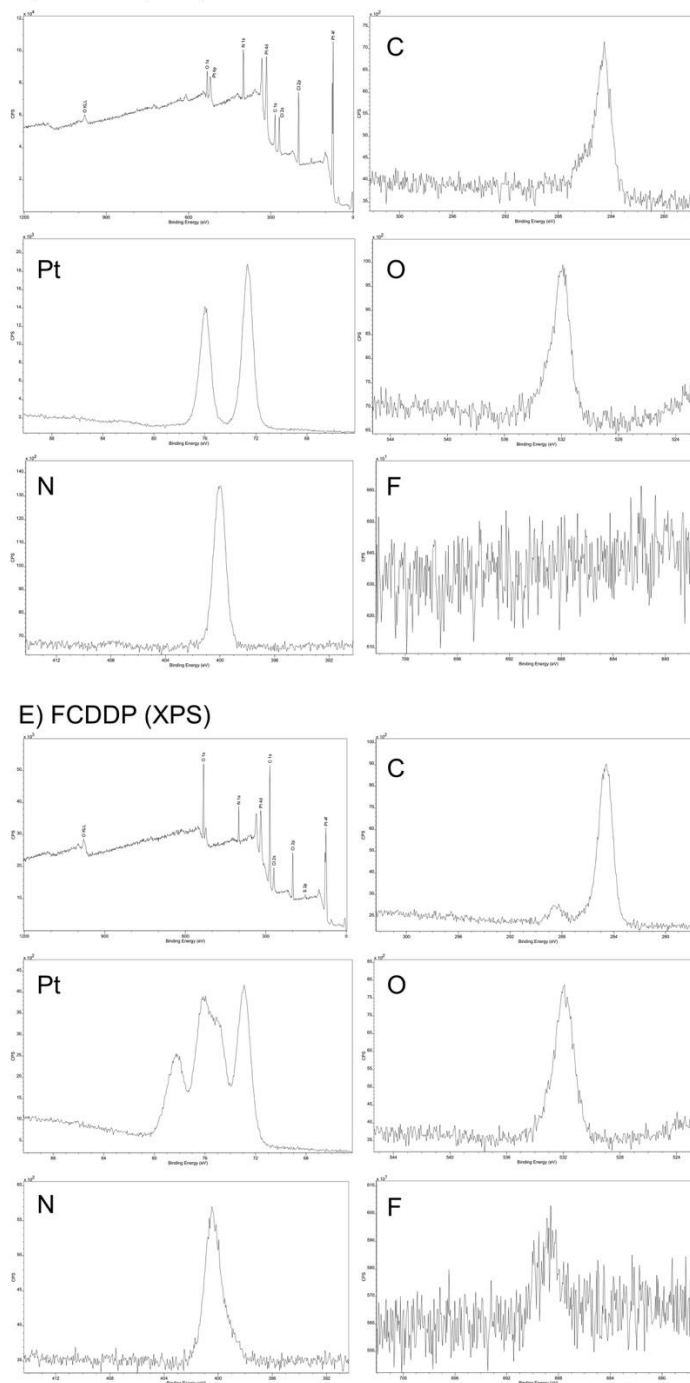

E) FCDDP (XPS)

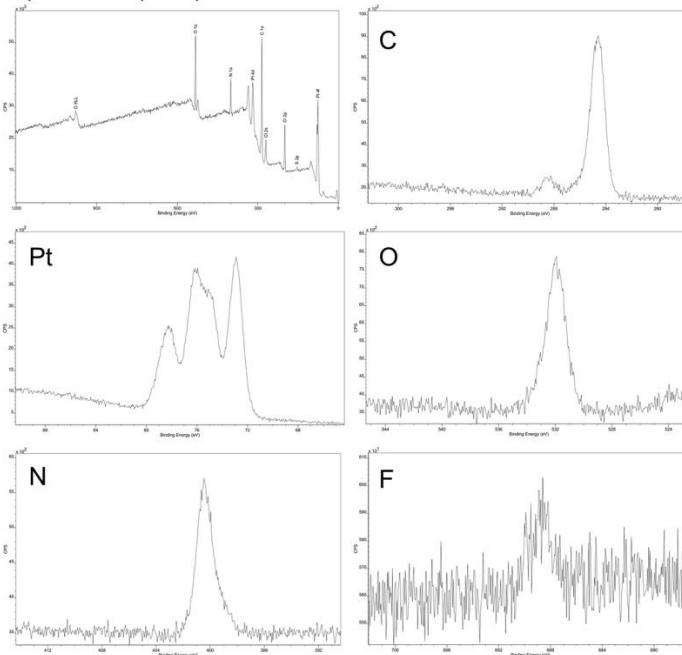

**Figure S1** characterization of HCDDP and FCDDP. A) and B) are the <sup>1</sup>H NMR spectrum of CDDP-(OH)<sub>2</sub> and HCDDP, respectively. C) <sup>19</sup>F NMR spectrum of FCDDP. D) and E) are the XPS spectrums of HCDDP and FCDDP, respectively.

Figure S2

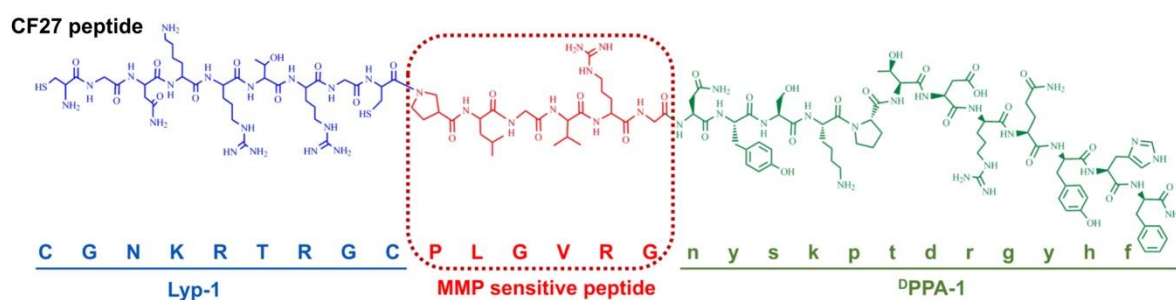

**Figure S2** The chemical structure of CF27.

Figure S3

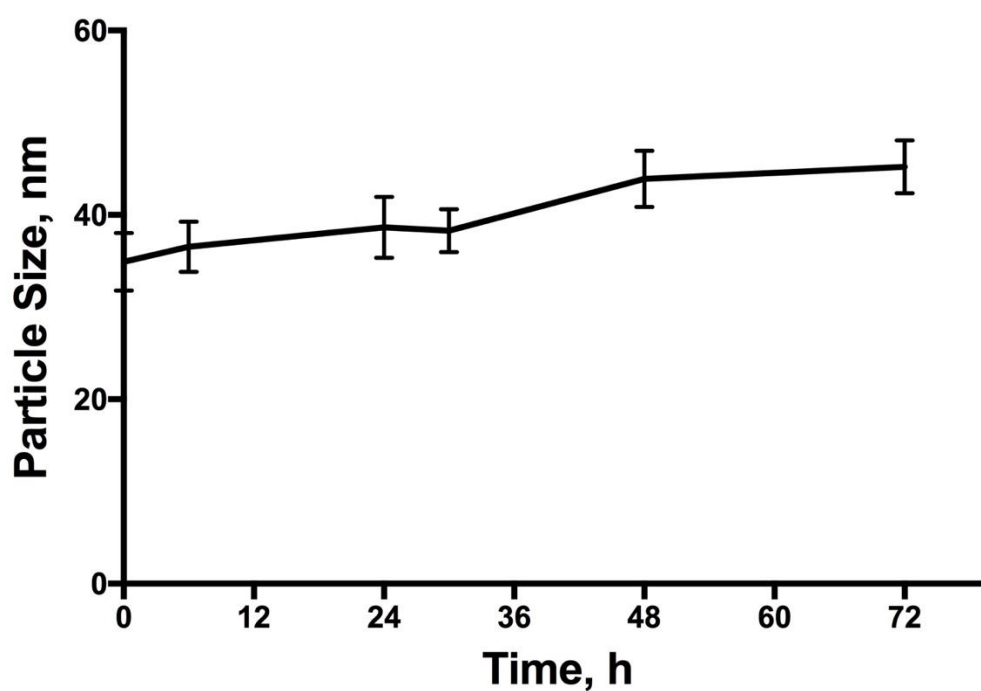

**Figure S3** Stability of DFBIC in the buffer with serum. Particle size variation *versus* time. Measured by DLS. (mean $\pm$ SD,  $n=3$ )

Figure S4

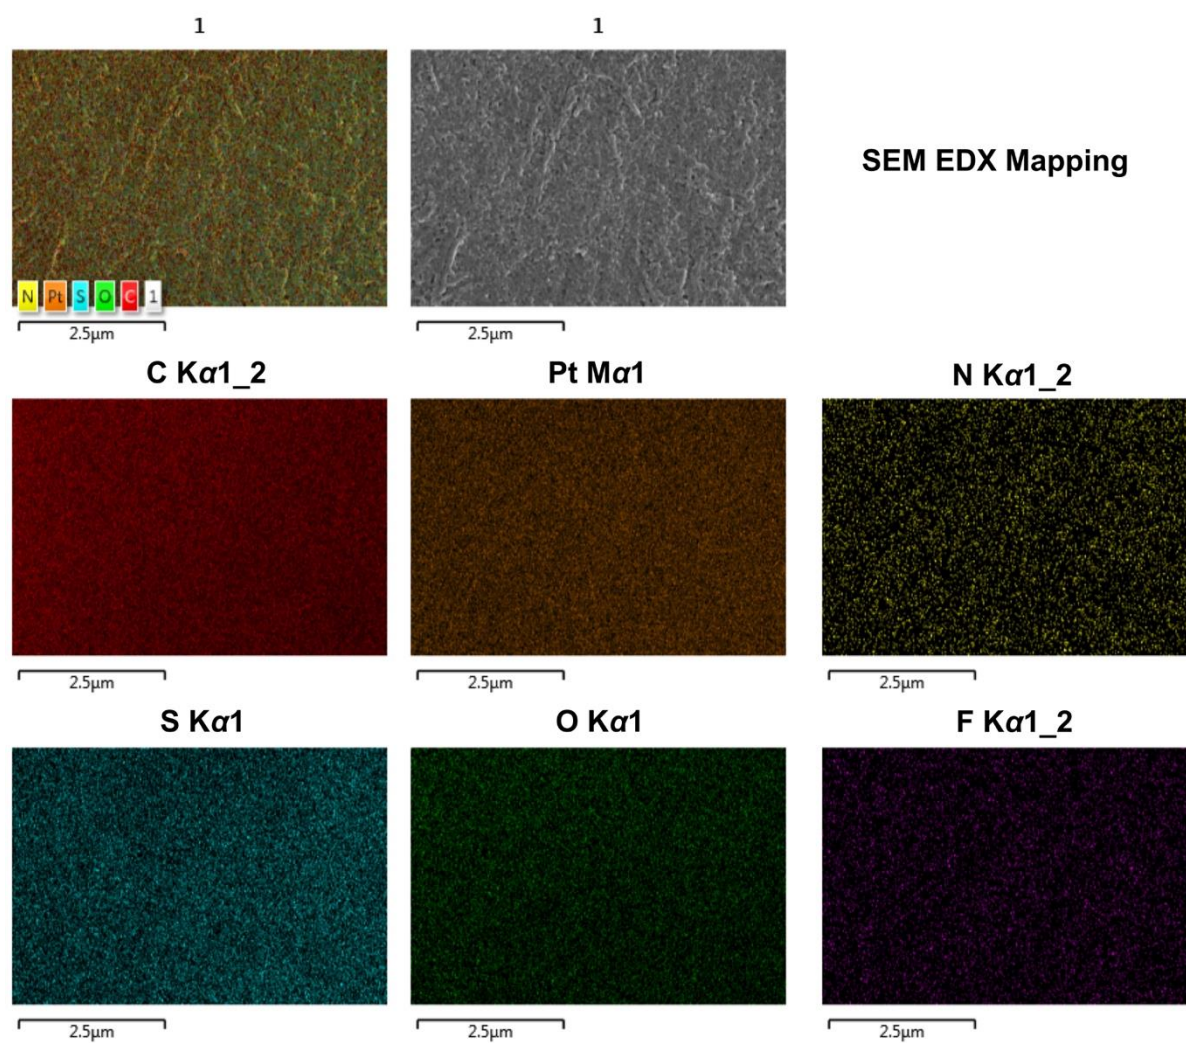

**Figure S4** The EDX mapping of the nanoassemblies.

Figure S5

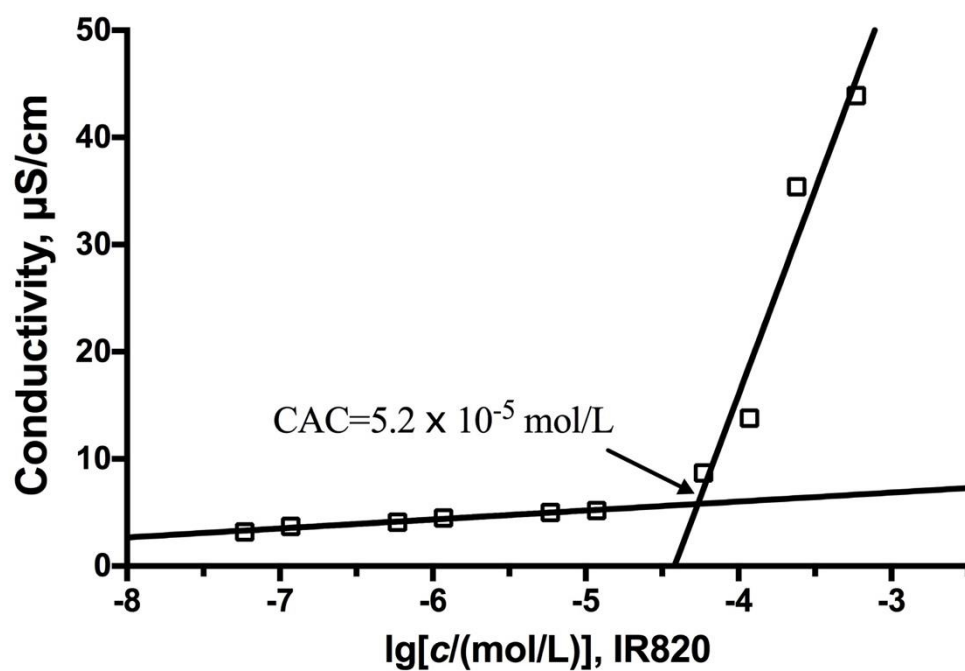

**Figure S5** The critical aggregation concentration (CAC) determined by detecting the conductivity of DFBI solutions (IR820:DTX:FCDDP was 6:5:3).

Figure S6

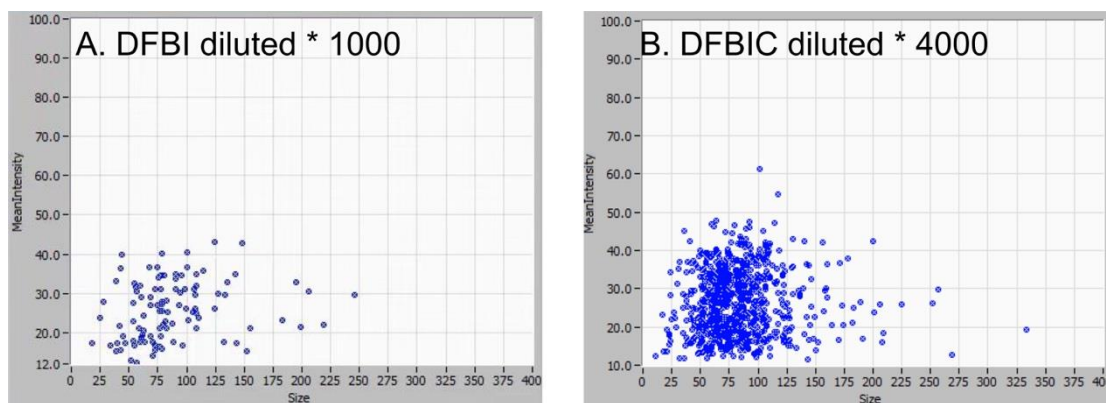

**Figure S6** Particle size distribution of the nanoassemblies after dilution measured by real-time nanoparticle tracking system. The unit of the Size is nm.

Figure S7

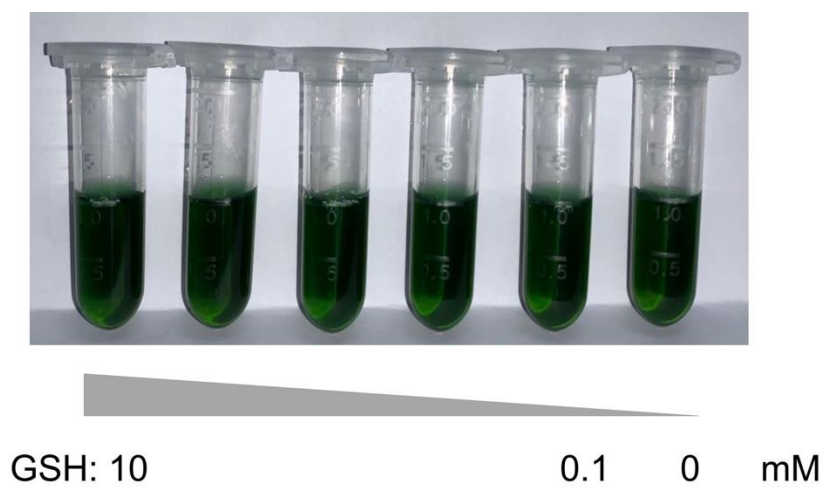

**Figure S7** No aggregation was observed in the nanoassemblies prepared without the introduction of BISS in the GSH buffers for 72 h. It indicates that the BISS is also a critical component for the formation of flocculation.

Figure S8

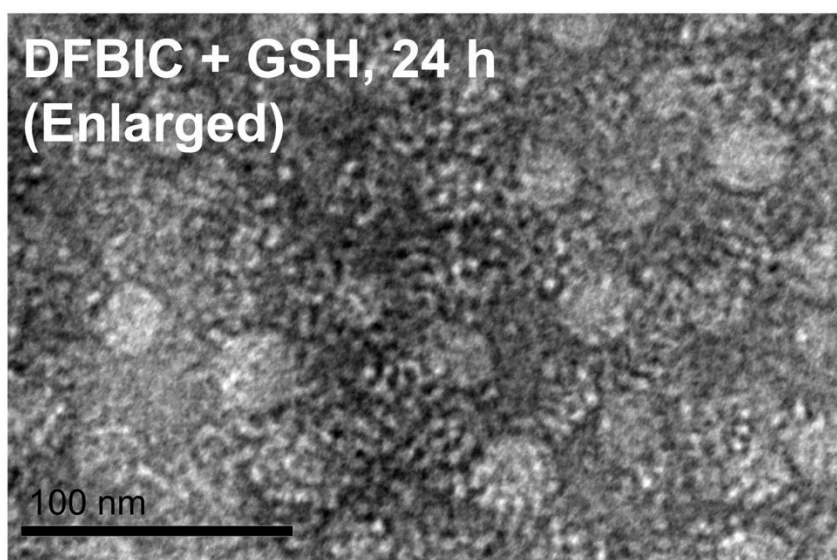

**Figure S8** TEM image of nanoassemblies after treated with GSH.

Figure S9

### FCDDP

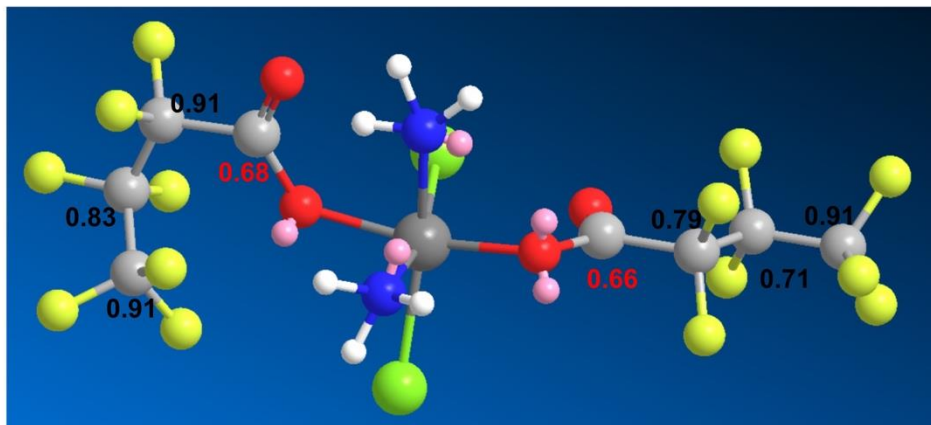

### HCDDP

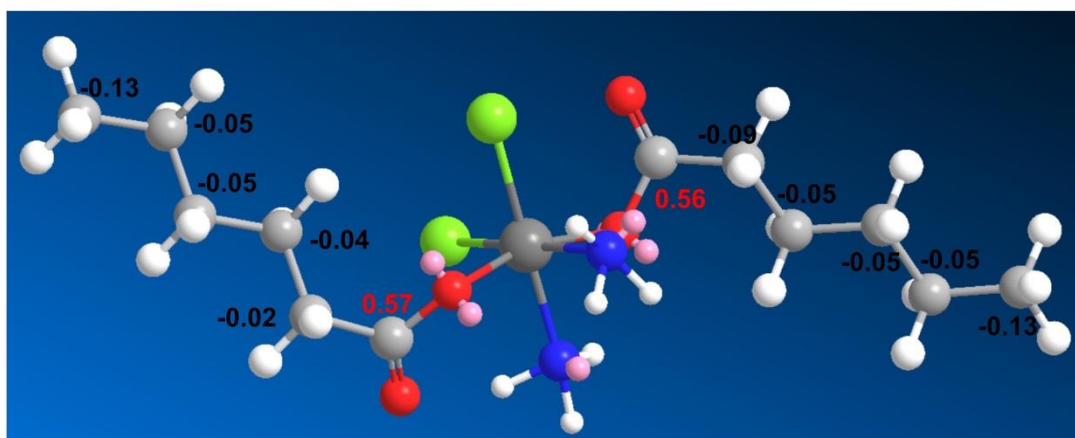

**Figure S9** Charge distribution of cisplatin prodrugs.

Figure S10

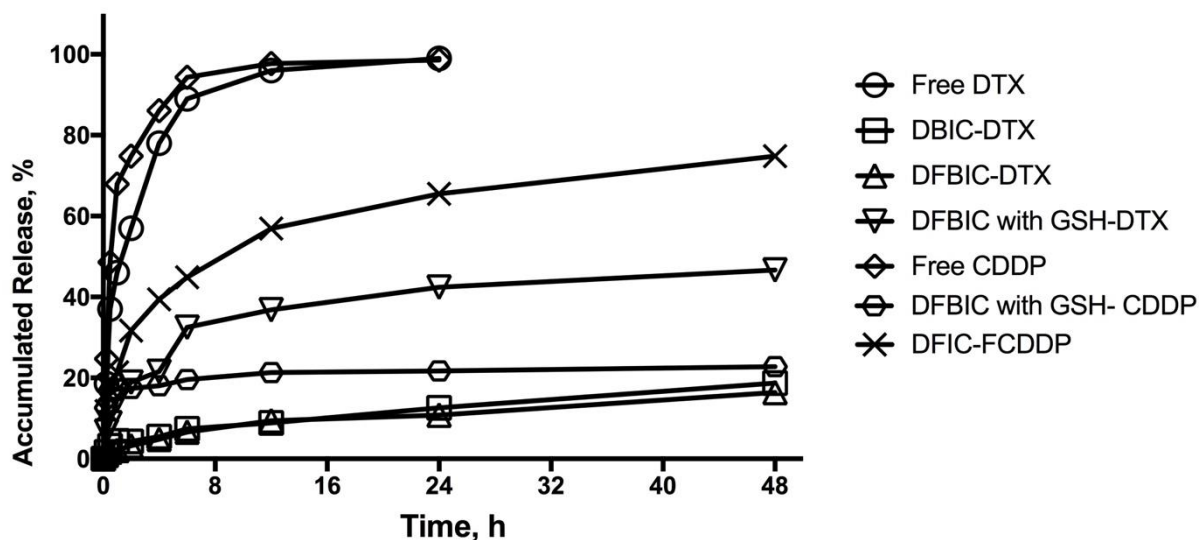

**Figure S10** The release profiles of the nanoassemblies in different buffers. The parameters of the buffers: Free DTX group: pH=7.4, 0.01M PBS, 0.5% of Tween 80, GSH concentration: 0 mmol/L; DBIC-DTX group: pH=7.4, 0.01 mol/L PBS, 0.5% of Tween 80, GSH concentration: 0 mmol/L; DFBIC-DTX group: pH=7.4, 0.01M PBS, 0.5% of Tween 80, GSH concentration: 0 mmol/L; DFBIC with GSH-DTX group: pH=7.4, 0.01M PBS, 0.5% of Tween 80, GSH concentration: 10 mmol/L; Free CDDP: pH=7.4, 0.01M PBS, 0.5% of Tween 80, GSH concentration: 0 mmol/L; DFBIC with GSH-CDDP: pH=7.4, 0.01 mol/L PBS, 0.5% of Tween 80, GSH concentration: 10 mmol/L; DFIC-FCDDP: pH=7.4, 0.01 mol/L PBS, 0.5% of Tween 80, GSH concentration: 0 mmol/L.

Figure S11

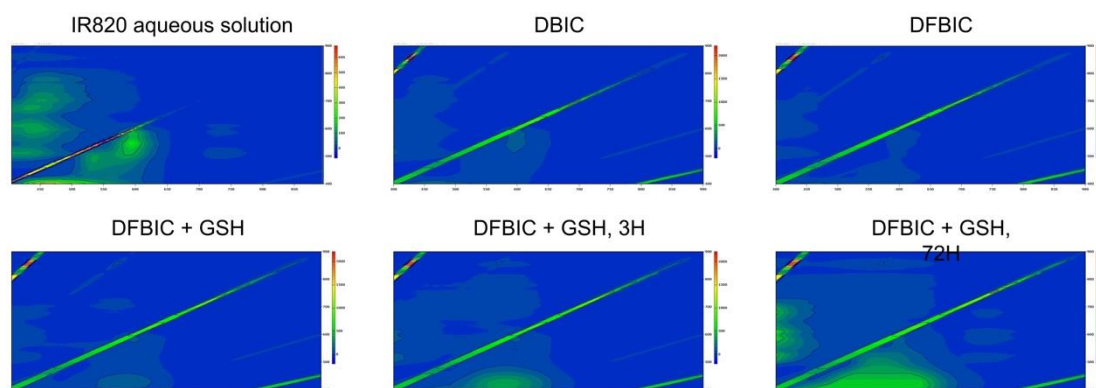

**Figure S11** 2D fluorescence spectrums of DBIC and DFBIC with or without the presence of GSH.

Figure S12

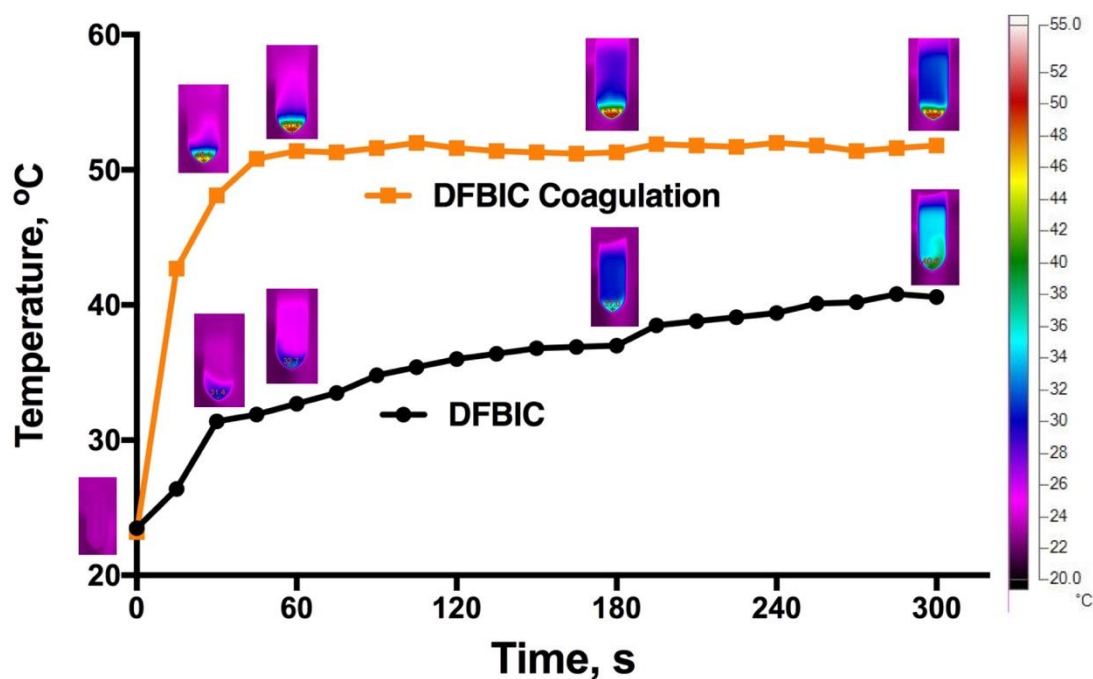

**Figure S12** Photothermal conversion of DFBIC nanoassembly or the coagulation of DFBIC.

Figure S13

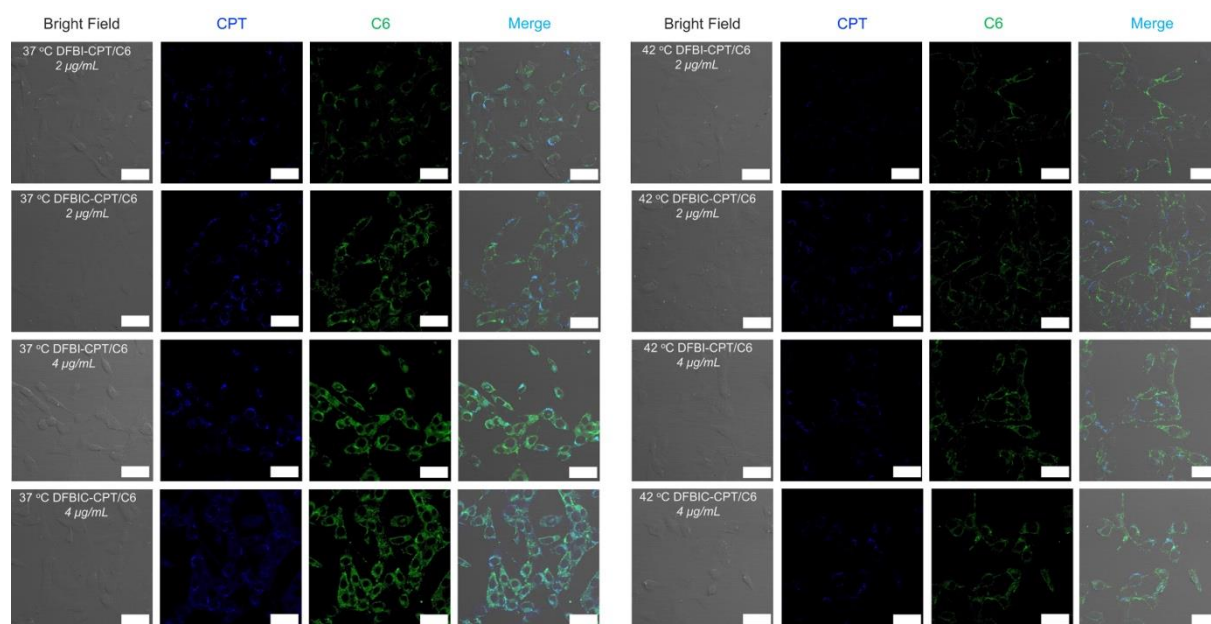

**Figure S13** Intracellular aggregation of nanoassemblies (DFBI and DFBIC) *in vitro*. Left: The cancer cells were treated with two different concentration (2 and 4  $\mu\text{g/mL}$ , respectively) of two different nanoassemblies (DFBIC and DFBI, respectively). Right: The cancer cells were treated with mild heating while treating with two different concentration (2 and 4  $\mu\text{g/mL}$ , respectively) of two different nanoassemblies (DFBIC and DFBI, respectively). Scale bar = 40  $\mu\text{m}$ .

Figure S14

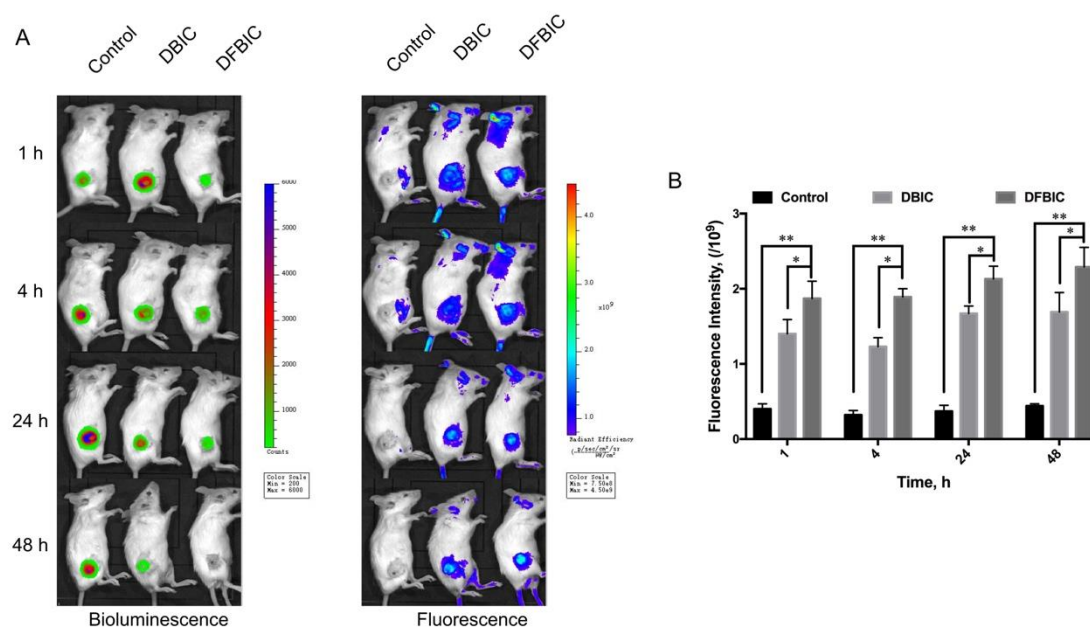

**Figure S14** Tumor-targeting ability of nanoassemblies. A) Living fluorescence images of the mice treated with different nanoassemblies. B) Fluorescent intensity of the tumors. (mean  $\pm$ SD,  $n=3$ , \* $P<0.05$ , \*\* $P<0.01$ ).

Figure S15

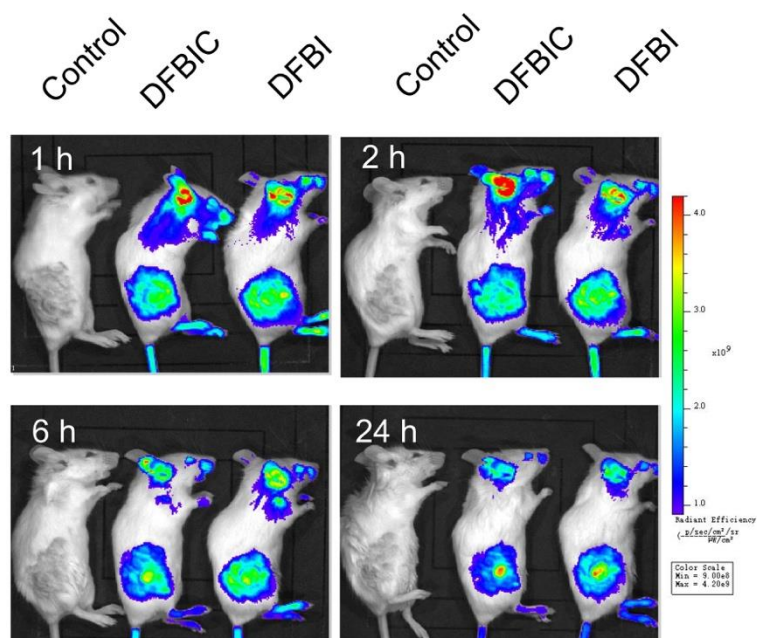

**Figure S15** Effect of modification of the tumor-targeting ligand onto the accumulation of nanoassemblies in the tumor site.

Figure S16

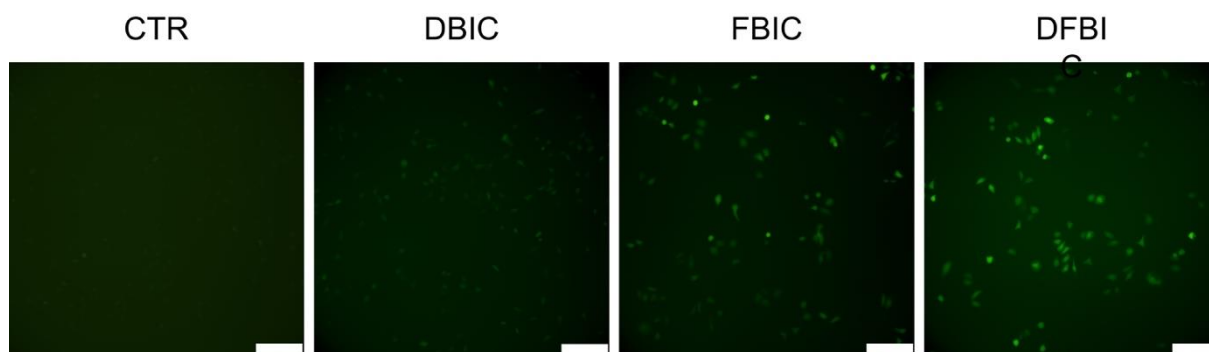

**Figure S16** The ROS production of the MDA-MB-231 cell lines after incubated with control, DBIC, FBIC, DFBIC, respectively. The fluorescent images of the tumor cells, 2.5  $\mu\text{g/mL}$  (DTX). Scale bar = 100  $\mu\text{m}$ .

Figure S17

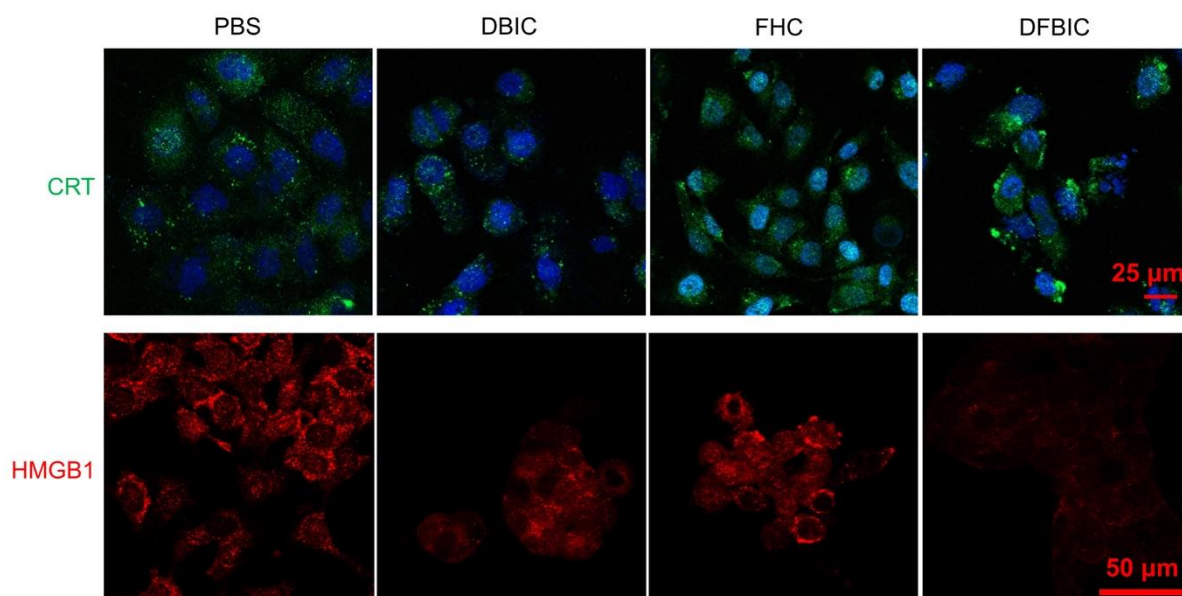

**Figure S17** The migration of CRT and HMGB1 *in vitro* after being treated with nanoassemblies.



**B**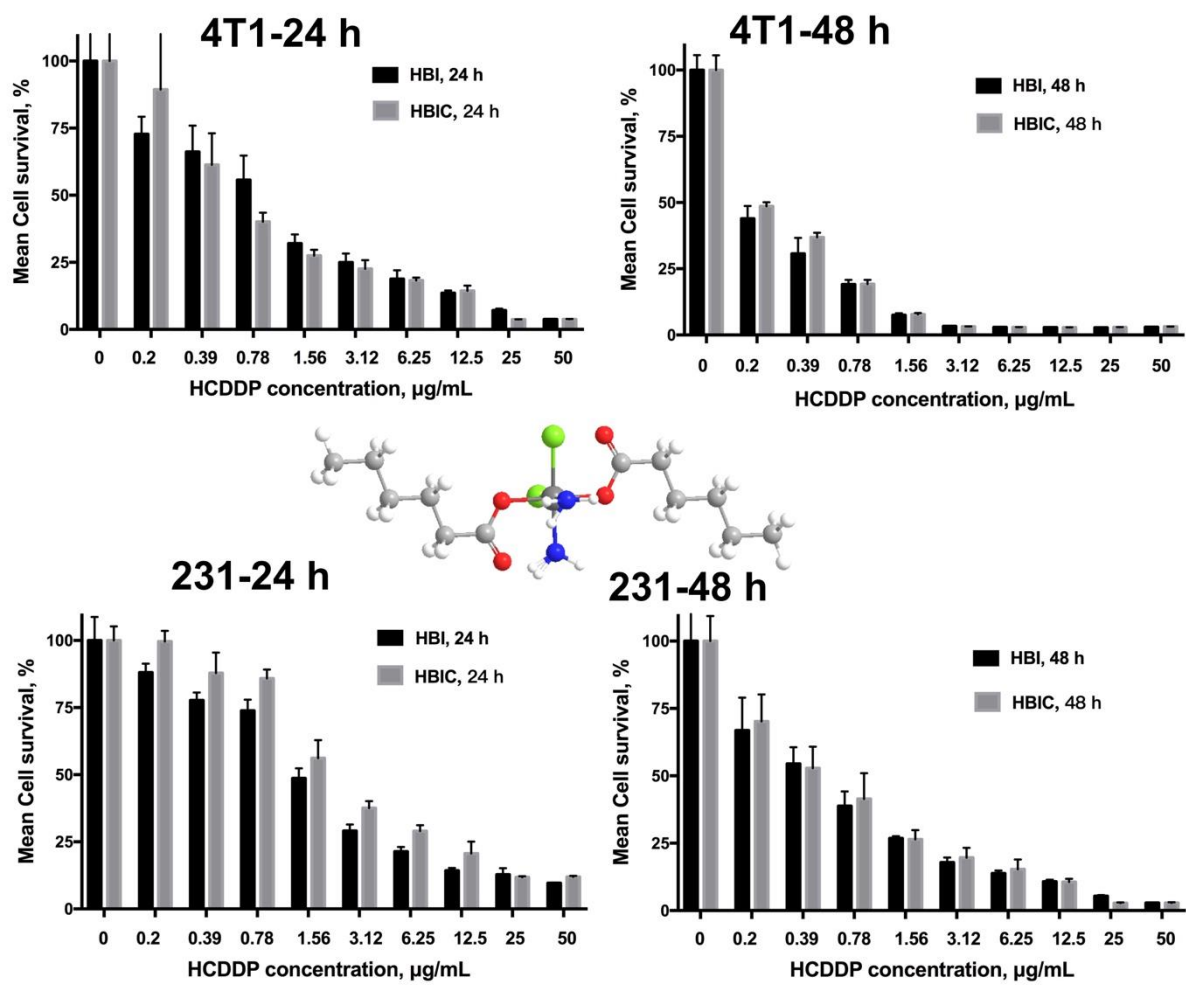

C

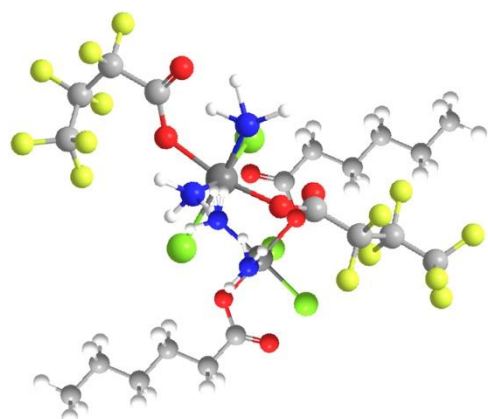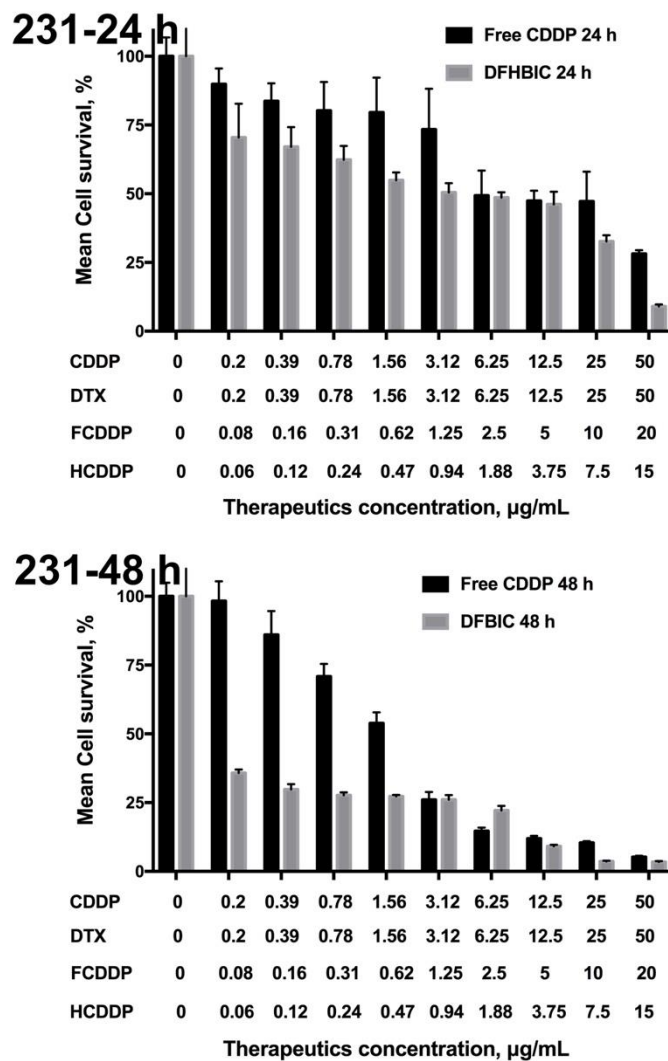

**Figure S18** Cytotoxicity of nanoassemblies to different cancer cell lines. (mean $\pm$ SD,  $n=6$ ). (A) the cytotoxicity of DFBIC to different cancer cell lines (including a PTX resistant cell line). (B) the cytotoxicity of DHBIC to different cancer cell lines. (C) the cytotoxicity of DFHBIC to different cancer cell lines.

Figure S19

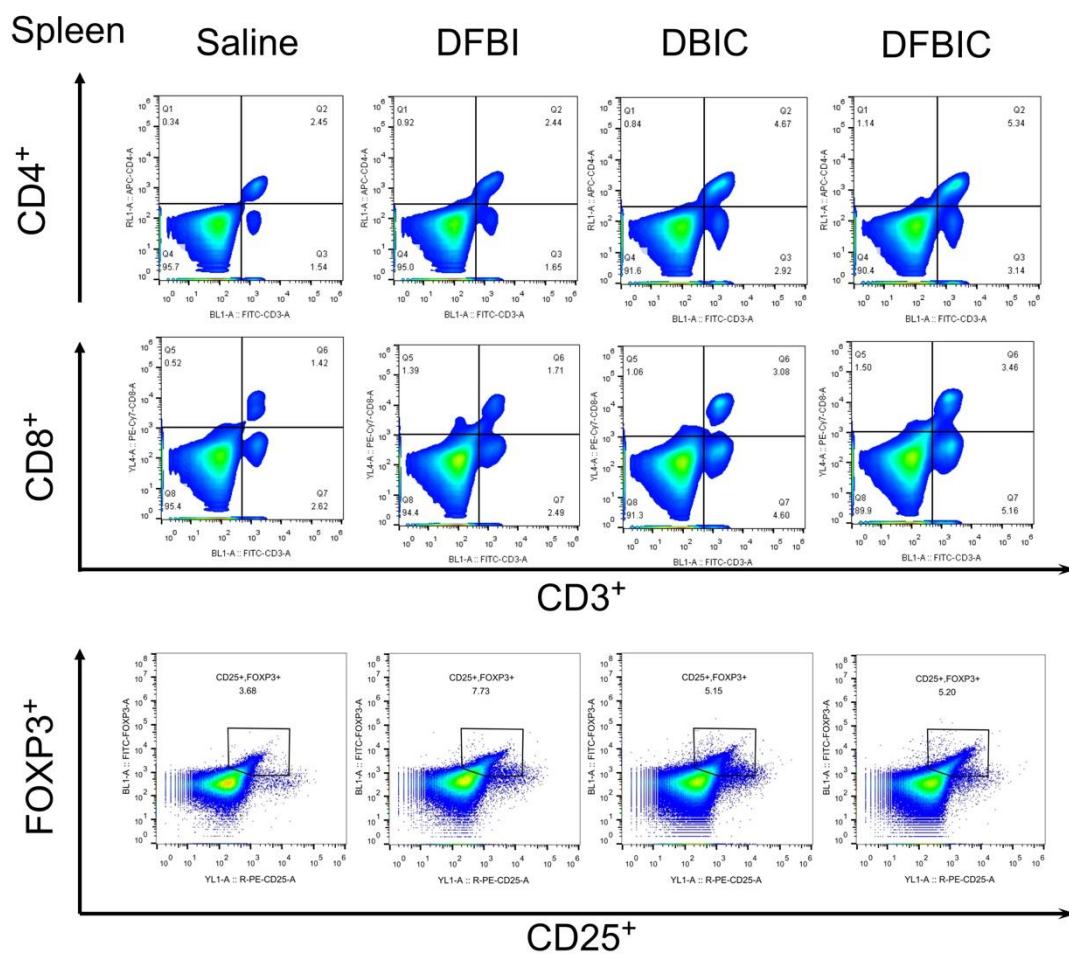

**Figure S19** Polulation of different immunocytes which extracted from the spleen tissues after being treated with different nanoassemblies and identified by flow cytometry.

Figure S20

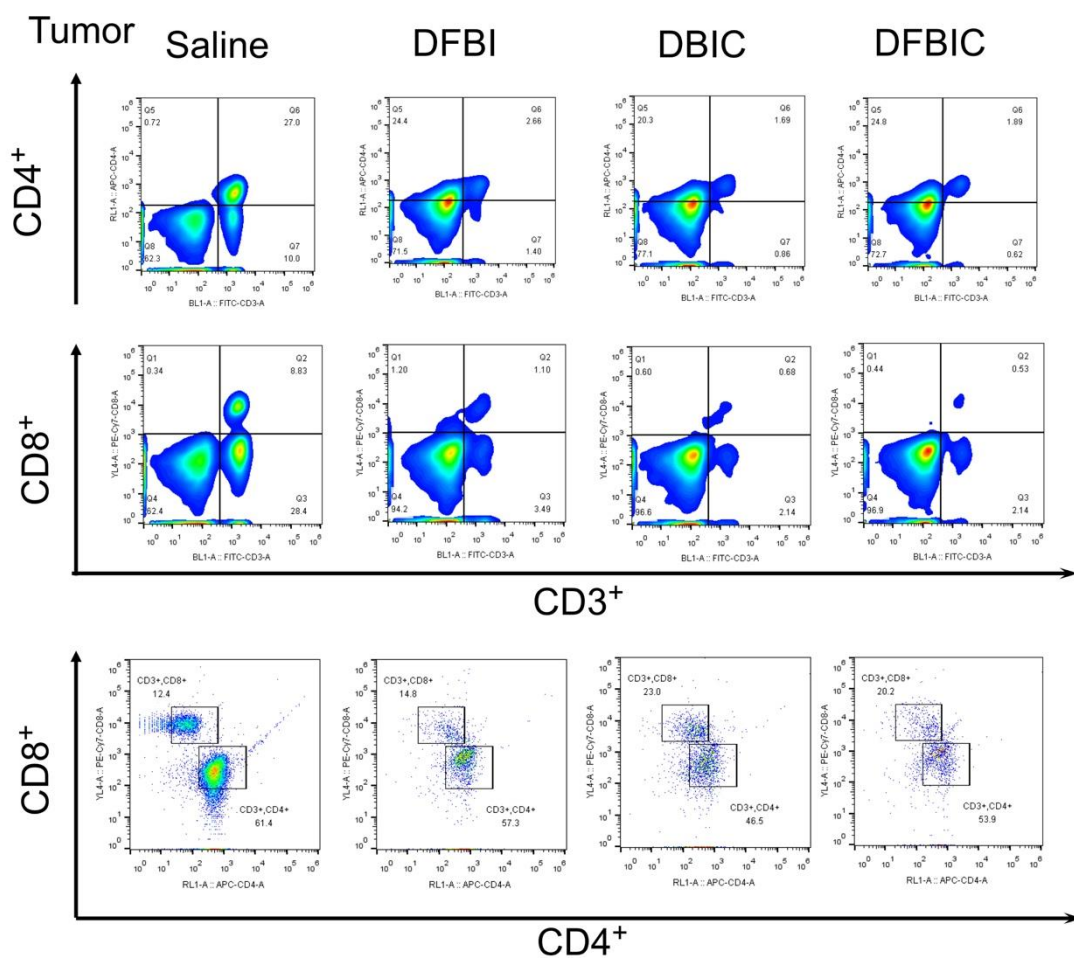

**Figure S20** Polulation of different immunocytes which extracted from the tumor tissues after being treated with different nanoassemblies.

Figure S21

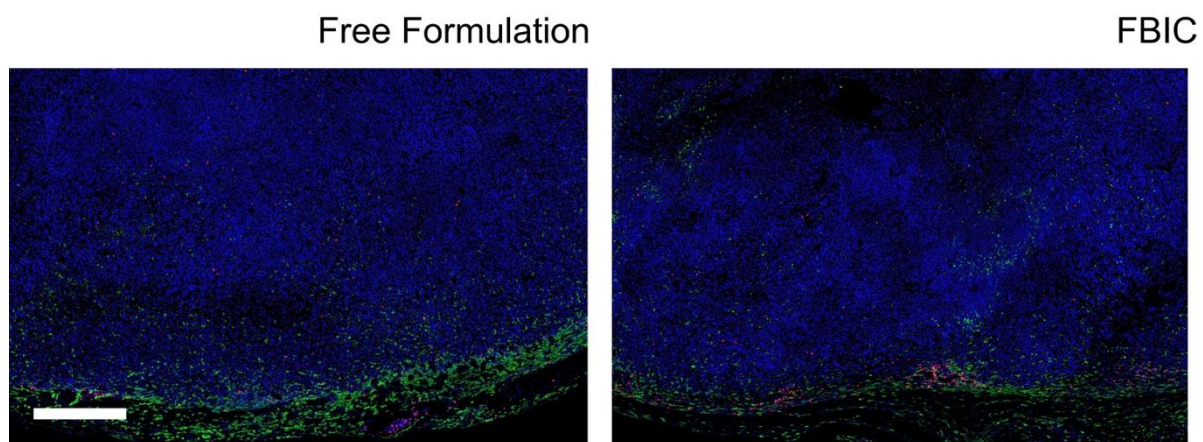

**Figure S21** Immunofluorescent staining of tumor tissues slide which extracted from the free formulation and FBIC-treated groups. Tumor tissues were all co-stained with DAPI,  $\alpha$ CD8 and  $\alpha$ IFN- $\gamma$ . Scale bar = 500  $\mu$ m.
